# Supplementary material for: Expression and Functional Studies on the Noncoding RNA, PRINS
Source: Int J Mol Sci. 2012 Dec 21;14(1):205–25. doi: 10.3390/ijms14010205 (PMC3565259; doi:10.3390/ijms14010205)
Supplement: Supplementary file 1 [file ijms-14-00205-s001.pdf]

# Supplementary Information

**Figure S1.** The proliferation/differentiation state of keratinocytes. The *in vitro* expression of NPM was followed in 3rd passage keratinocytes (See Figure 5). The 0 h samples were taken from subconfluent cultures. The process of differentiation was followed by the increase of the differentiation marker keratin 10 and the decrease of the proliferation-related gene, alpha5 integrin.

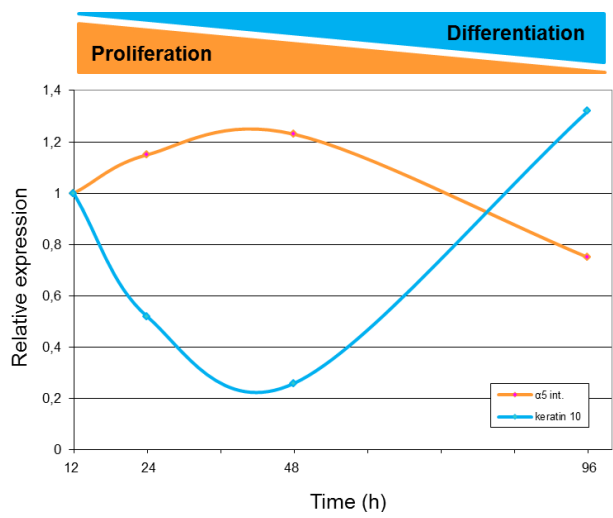

**Figure S2.** UV-B induced NPM trafficking in NHEKs. Unirradiated and UV-B-irradiated (312 nm, 40 mJ/cm<sup>2</sup>) NHEKs were followed for the indicated periods of time, fixed and immunostained for NPM. DNA was stained with DAPI.

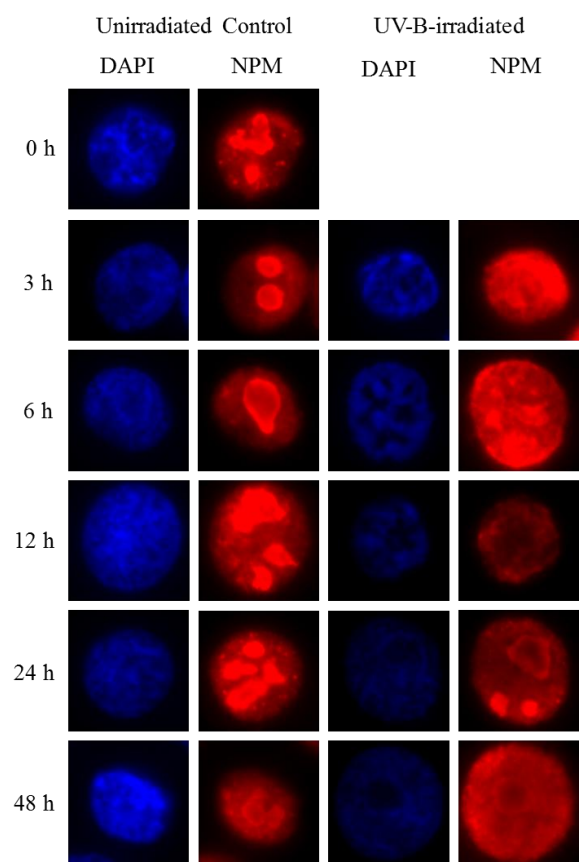

**Figure S3.** The effectiveness of PRINS gene-specific silencing and its effect on NPM expression. HPV-Ker cells transfected with a pSilencer vector expressing an siRNA specific for PRINS (AK696,  $n = 3$ ) or a scrambled sequence (SC1313,  $n = 3$ ) were cultured in supplement-free medium for 24 h. Data are indicated as fold expressions compared to empty vector-transfected cells ( $n = 3$ ). Error bars show the SEM of the results of three independent experiments. (A) PRINS expression was determined by real-time RT-PCR. (B) NPM expression was determined by real-time RT-PCR.

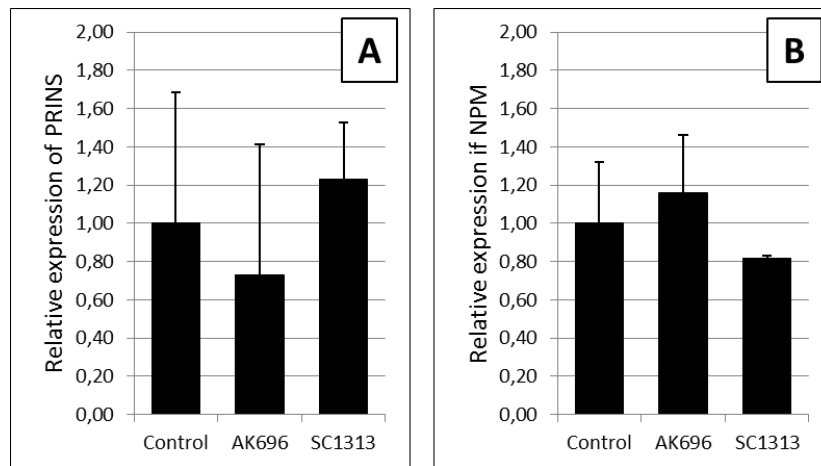

**Figure S4.** The effect of PRINS gene-specific silencing on the intracellular shuttling of the NPM-GFP construct in HPV-Ker cells. HPV-Ker cells were transfected with an NPM-GFP chimeric construct. Next day the cells were transfected with the PRINS gene-specific silencing vector (AK696), or with the vector containing the scrambled sequence (SC1313), or with an empty vector as control. Twenty-four hours after transfection the unirradiated and the UV-B-irradiated (312 nm, 40 mJ/cm<sup>2</sup>) HPV-Ker cells were followed for the indicated periods of time, fixed and stained with DAPI (blue).

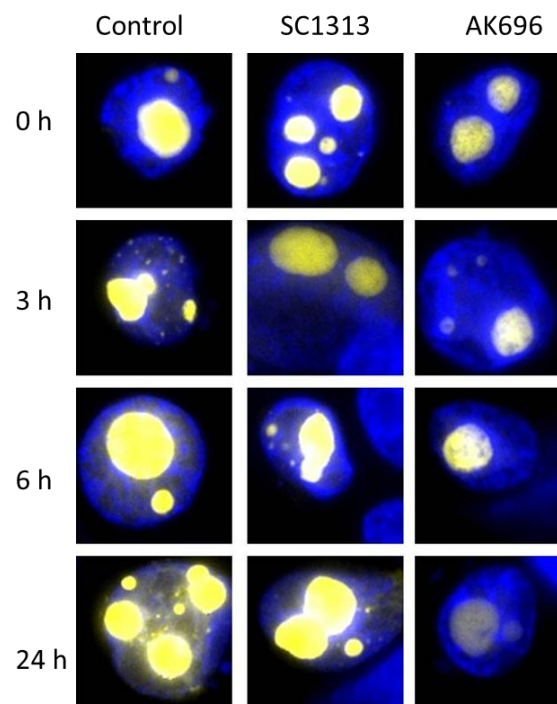

**Table S1.** *In silico* prediction of PRINS binding proteins.

| No. of nucleotide on PRINS sequence |      | Description of putative binding factor                                                                                                                            |
|-------------------------------------|------|-------------------------------------------------------------------------------------------------------------------------------------------------------------------|
| 422                                 | 433  | Krueppel-like C2H2 zinc finger factors hypermethylated in cancer                                                                                                  |
| 934                                 | 956  | Peroxisome proliferative activated receptor homodimers                                                                                                            |
| 1233                                | 1249 | Olfactory associated zinc finger protein                                                                                                                          |
| 1246                                | 1258 | GDNF-inducible zinc finger gene 1                                                                                                                                 |
| 1251                                | 1263 | C/EBP homologous protein (CHOP)                                                                                                                                   |
| 1327                                | 1341 | Sterol regulatory element binding proteins                                                                                                                        |
| 1384                                | 1394 | D-abl DNA binding sites                                                                                                                                           |
| 1394                                | 1406 | GHF-1 pituitary specific pou domain transcription factor                                                                                                          |
| 1618                                | 1626 | AARE binding factors                                                                                                                                              |
| 1781                                | 1795 | Metal induced transcription factor                                                                                                                                |
| 1786                                | 1800 | Sterol regulatory element binding proteins                                                                                                                        |
| 1801                                | 1813 | OCT6 binding factor_astrocytes + glioblastoma cells                                                                                                               |
| 1832                                | 1850 | Microphthalmia transcription factor                                                                                                                               |
| 1855                                | 1893 | General transcription factor IID, GTF2D                                                                                                                           |
| 1976                                | 1992 | Carbohydrate response elements, consist of two E box motifs separated by 5 bp                                                                                     |
| 2033                                | 2043 | ZF5 POZ domain zinc finger                                                                                                                                        |
| 2329                                | 2341 | Krueppel-like C2H2 zinc finger factors hypermethylated in cancer                                                                                                  |
| 2668                                | 2680 | Regulator of B-Cell IgH transcription                                                                                                                             |
| 2687                                | 2697 | Calsenilin, presenilin binding protein, EF hand transcription factor                                                                                              |
| 2987                                | 2997 | Calsenilin, presenilin binding protein, EF hand transcription factor                                                                                              |
| 3117                                | 3129 | RP58 (ZFP 38) zinc finger protein                                                                                                                                 |
| 3145                                | 3157 | GDNF-inducible zinc finger gene 1                                                                                                                                 |
| 3236                                | 3248 | Y-box binding transcription factors, multifunctional proteins involved in transcriptional and translational regulation, mRNA splicing, DNA replication and repair |
| 3274                                | 3286 | Farnesoid S-activated receptor response elements                                                                                                                  |
| 3318                                | 3334 | Olfactory associated zinc finger protein                                                                                                                          |
| 3461                                | 3473 | Regulator of B-Cell Ig H transcription                                                                                                                            |
